RESEARCH ARTICLE

# The contribution of pediatric surgery to poverty trajectories in Somaliland

Emily R. Smith<sup>1,2‡\*</sup>, Tessa L. Concepcion<sup>1‡</sup>, Mubarak Mohamed<sup>3</sup>, Shugri Dahir<sup>3</sup>, Edna Adan Ismail<sup>3</sup>, Henry E. Rice<sup>1</sup>, Anirudh Krishna<sup>4</sup>, on behalf of the Global Initiative for Children's Surgery<sup>1</sup>

**1** Duke Global Health Institute, Duke University, Durham, NC, United States of America, **2** Department of Public Health, Robbins College of Health and Human Services, Baylor University, Waco, TX, United States of America, **3** Edna Adan University Hospital, Hargeisa, Somaliland, **4** Sanford School of Public Policy, Duke University, Durham, NC, United States of America

‡ These authors are shared first-authors on this work.

¶ Complete membership of the author group can be found in the Acknowledgments

\* [emily\\_r\\_smith@baylor.edu](mailto:emily_r_smith@baylor.edu)

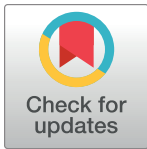

**OPEN ACCESS**

**Citation:** Smith ER, Concepcion TL, Mohamed M, Dahir S, Ismail EA, Rice HE, et al. (2019) The contribution of pediatric surgery to poverty trajectories in Somaliland. PLoS ONE 14(7): e0219974. <https://doi.org/10.1371/journal.pone.0219974>

**Editor:** Shihe Fu, Xiamen University, CHINA

**Received:** January 12, 2019

**Accepted:** July 5, 2019

**Published:** July 26, 2019

**Copyright:** © 2019 Smith et al. This is an open access article distributed under the terms of the [Creative Commons Attribution License](https://creativecommons.org/licenses/by/4.0/), which permits unrestricted use, distribution, and reproduction in any medium, provided the original author and source are credited.

**Data Availability Statement:** Data cannot be shared publicly because of public deposition from the ethics committee who approved the study. Data are available from the Duke Institutional Data Access / Ethics Committee (contact via [ResearchServiceDesk@duke.edu](mailto:ResearchServiceDesk@duke.edu)) for researchers who meet the criteria for access to confidential data.

**Funding:** Initials of the authors who received each award: ERS, TLC. Grant numbers awarded to each author: We did not have any grant numbers. The full name of each funder: Duke Global Health

## Abstract

### Background

The provision of health care in low-income and middle-income countries (LMICs) is recognized as a significant contributor to economic growth and also impacts individual families at a microeconomic level. The primary goal of our study was to examine the relationship between surgical conditions in children and the poverty trajectories of either falling into or coming out of poverty of families across Somaliland.

### Methods

This work used the Surgeons OverSeas Assessment of Surgical Need (SOSAS) tool, a validated household, cross-sectional survey designed to determine the burden of surgical conditions within a community. We collected information on household demographic characteristics, including financial information, and surgical condition history on children younger than 16 years of age. To assess poverty trajectories over time, we measured household assets using the Stages of Progress framework.

### Results

We found there were substantial fluxes in poverty across Somaliland over the study period. We confirmed our study hypothesis and found that the presence of a surgical condition in a child itself, regardless of whether surgical care was provided, either reduced the chances of moving out of poverty or increased the chances of moving towards poverty.

### Conclusion

Our study shows that the presence of a surgical condition in a child is a *strong singular predictor* of poverty descent rather than upward mobility, suggesting that this stressor can limit the capacity of a family to improve its economic status. Our findings further support many

Institute, Baylor University. URL of each funder website: <https://globalhealth.duke.edu/>; <https://www.baylor.edu/chhs/> The funders had no role in study design, data collection and analysis, decision to publish, or preparation of the manuscript.

**Competing interests:** The authors have declared that no competing interests exist.

existing macroeconomic and microeconomic analyses that surgical care in LMICs offers financial risk protection against impoverishment.

## Introduction

The provision of health care in low-income and middle-income countries (LMICs) is increasingly recognized as a significant contributor to economic growth. Many areas of surgical care are highly cost-effective, with similar values to traditional public health programs.[1–4] The World Health Organization (WHO), the World Bank, and the United Nations have all noted that access to adequate surgical care is essential to achieve the Sustainable Development Goals (SDGs), particularly towards poverty reduction.[5–7] Surgery is essential to both health-system strengthening and universal health coverage, as a functional health system cannot be realized without surgical access.[1, 8, 9]

The provision of surgical care in LMICs not only affects national economies on a macroeconomic level, but also impacts individual families and communities at a microeconomic level. By macroeconomic measures, the failure to provide surgical care has been estimated to lead to reduction in gross domestic product (GDP) by as much as 2% in many LMICs by 2030.[1] Most existing microeconomic studies have measured the financial burden of medical costs on impoverishment, with up to 81 million people estimated to be at risk of falling into poverty due to catastrophic expenditures related to direct costs of surgical care as well as indirect costs of required lodging, transportation, and food.[1] However, these studies do not measure how the presence of a surgical condition itself impacts the risks of poverty, regardless of health care expenditures. Furthermore, given that up to 50% of the population in the majority of LMICs are children and many of these children will have surgical conditions,[10–20] the financial impact of surgical care for children constitutes a much-needed research area.[21] Why some families are devastated by surgical costs while similar families are able to rebound economically is not well understood.[22]

The trajectories of families either falling into poverty or coming out of poverty over time in LMICs may offer a helpful measure of how health conditions and medical costs affect household poverty. Most existing health economic analyses require comparison of expenditures with family income, which is challenging in many low income countries where a high percentage of the population depend on subsistence income.[22, 23] In contrast, the Stages of Progress method is a community-based, validated, and widely used methodology to accurately assess poverty status and fluxes in LMICs. These research tools are not dependent on measure of annual income, rather they are based on assessment of family's acquisitions and depletions of assets over time. The Stages of Progress scale assesses the structural conditions of households, and limits stochastic or transient variations.[24] These scales can be used to identify factors which affect poverty trajectories, which is critical for policy development.[22, 25]

Somaliland is a low-income country in Sub-Saharan Africa and the 4<sup>th</sup> poorest country in the world, with tremendous economic and health care challenges as it rebuilds from civil conflict.[26] Our previous work has identified a high burden of surgical conditions in children across Somaliland, as well as need for expansion of surgical infrastructure and workforce, particularly in rural areas.[27] The primary goal of our current study was to examine the relationship between surgical conditions in children and the poverty trajectories of families across Somaliland. We hypothesized that some families would face severe poverty descents by either the presence of a surgical condition itself or surgical care for their children.

## Methods

### Setting

Our study took place in Somaliland, a country in the Horn of Africa which although not recognized as an independent state, has achieved relative stability since separation from Somalia with an autonomous government since 1991. The country has a GDP per capita of \$347, classifying it as a low-income country by World Bank income groups and the fourth poorest in the world.[28] Approximately 53% of the population lives in urban centers, 11% in rural areas, and 34% is nomadic or semi-nomadic.[28] Infant and under-5 mortality rates are 91 and 72 per 100,000 respectively,[29] compared to the overall mortality rates in Sub-Saharan Africa of 55 and 83 per 100,000, respectively.[30, 31] Somaliland includes 6 regions: Awdal, Maroodi Jeex, Sahil, Sanaag, Sool, and Togdheer. Approximately 50% of the total population of 4 million people are children under the age of 16.[32]

### Participants and data collection

Our current study was an extension of previous work examining the burden of surgical conditions in children as well as hospital infrastructure and workforce in Somaliland.[27] We collected data between August and December 2017 from 838 households across all regions of Somaliland for a total of 1,503 children, described in detail elsewhere.[27] In brief, we used community-based sampling of survey clusters in all regions of Somaliland. Survey clusters were randomly selected in a two-stage process with a probability adjustment for population by region and cluster. Random selection was country-wide through proportional-to-size methodology and participants were not randomly selected based on the presence of a surgical condition, income level, or any other demographic factor. This work used the Surgeons OverSeas Assessment of Surgical Need (SOSAS) tool, a validated cluster-based, cross-sectional survey designed to determine the burden of surgical conditions within a community.[33–37] We collected information on household demographic characteristics, including household size and financial information, and surgical condition history on children younger than 16 years of age.

We defined surgical conditions using the Lancet Commission on Global Surgery (LCoGS) as “any disease, illness, or injury in which surgical care can potentially improve the outcome.”<sup>1</sup> A surgical need was self-reported by the parents or guardians of the children as a condition that required surgical consultation. The respondents were first asked if their child has had a wound, burn, mass / goiter, deformity (congenital or acquired) or problem with specific problems associated with a certain body region. If so, follow up questions were asked about problem specifics, surgical treatment sought, and disability. Prior to data analysis, conditions were confirmed as surgical by one pediatric surgeon not involved with data collection. The lifetime prevalence of surgical conditions was determined as the rate of children who reported a surgical condition at some point in their life. Respondents were asked if any type of care was provided for these surgical conditions, including care provided at a healthcare facility (defined as care provided by a physician or a nurse at a health facility) or traditional care (defined as care provided by a traditional healer outside of a healthcare facility).

**Poverty trajectories.** To assess poverty trajectories over time, we measured household assets using the Stages of Progress framework (see detailed description[25, 38]). Using concepts from the Social Capital Assessment Tool (SCAT),[39] we queried each household for the assets they owned at different points in time. Stages of progress from poverty to non-poverty included asset acquisitions of chickens, farm animals, TV/radio, refrigerator, washing machines, and cars. Reference time point cutoffs were used, including over the past three years (as referenced when the current drought started in Somaliland) and seven years (as referenced

by the previous Somaliland presidential election). We calculated the total number of household's assets and defined the accumulation or loss of assets over time as an indicator of financial stability and poverty trajectory in line with the Stages of Progress framework.[22, 25]

Given that household income is difficult to accurately measure for many households in LMICs as many do not work in the formal sector or have a consistent income,[22, 23] we used assets as an indicator of poverty status.[24] We calculated an asset score for each household by summing the total of assets. This construction was justified because, as we found, assets are usually accumulated in a step-wise fashion, with functional assets (such as chickens and ducks) accumulated first and expensive or luxury assets (such as refrigerators, washing machine and cars) accumulated later—in sequence, as illustrated later (see Fig 1).[38]

### Data analysis

Data on total assets was collected at the time of survey (denoted current, 2017), three years prior to survey (2014), and seven years prior to survey (2010). Therefore, two intervals were recorded to measure changes in assets: between seven to three years prior to survey, and between three years prior to survey and current. Families were identified as **moving away from poverty** (“Moved up”) if their interval changes (from 7–3 years, from 3-years-current) were zero/positive, positive/positive, positive/zero, or negative/positive, with the second change being the most recent. Families were identified as **moving towards poverty** (“Moved down”) if their interval changes were zero/negative, negative/negative, negative/zero, or positive/negative. Families were identified as **remaining neutral towards poverty** (“Stayed same”) if interval changes were zero/zero (Table 1).

Households and individuals were weighted based on known regional populations from census data[40] and pediatric proportion estimates.[32] Mean asset scores were compared between groups using the weighted values and categorical variables were compared using the weighted chi-square statistic.

**Multivariate models.** To identify variables associated with poverty trajectories, we used multivariate logistic regression analysis using a logit model. Variables used in the multivariate models were chosen based on univariate associations with the outcome and included

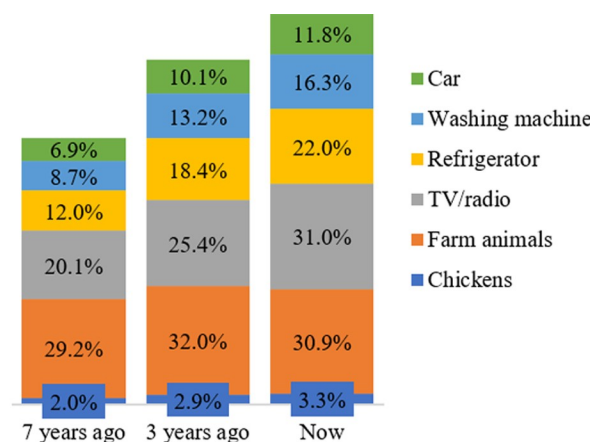

\*Assets accumulated stepwise beginning with chickens, farm animals, TV/radio, refrigerator, washing machine, and then cars. Households that have a ‘higher’ asset tend to possess the ‘lower’ assets as well.

**Fig 1. Descriptive status of household assets in Somaliland.**

<https://doi.org/10.1371/journal.pone.0219974.g001>

**Table 1. Poverty trajectory identification from changes in asset totals.**

| CHANGE IN ASSET TOTAL        |                          | No. | DIRECTION   |
|------------------------------|--------------------------|-----|-------------|
| Between 3 years– 7 years ago | Between now– 3 years ago |     |             |
| Increased                    | Increased                | 34  | Moved up    |
| No change                    | Increased                | 88  |             |
| Increased                    | No change                | 111 |             |
| Decreased                    | Increased                | 11  |             |
| No change                    | No change                | 492 | Stayed same |
| Decreased                    | Decreased                | 17  | Moved down  |
| Decreased                    | Stayed the same          | 47  |             |
| Stayed the same              | Decreased                | 25  |             |
| Increased                    | Decreased                | 13  |             |

<https://doi.org/10.1371/journal.pone.0219974.t001>

demographic characteristics (household income, household size, region, presence of a pediatric surgical condition, and receipt of surgical procedure). Odds ratios and confidence intervals were calculated while adjusting for other covariates. Data were analyzed using SAS 9.4 (SAS, Cary, NC) and Microsoft Excel 2010 (Microsoft, Redmond, WA). All data were analyzed incorporating proportional-to-size methodology, cluster-based sampling, and design weights based on sampling fractions.

### Ethical consideration

Institutional Review Board (IRB) approval was granted from the Duke University Institutional Review Board. Since Somaliland does not have a national IRB, a letter of approval was granted from the Somaliland Ministry of Health. Participants in the community survey offered verbal consent for study participation. A parent or guardian provided consent for all children younger than 15 years old, and children between the ages of 12 and 15 provided assent. For the majority of children enrolled, parents answered all questions in the survey.

### Results

We found there were substantial fluxes in poverty across Somaliland over the study period, although overall most families moved away from poverty over the past seven years as the country rebounds from recent civil conflict. We confirmed our study hypothesis and found that the presence of a surgical condition in a child itself, regardless of whether surgical care was provided, either *reduced* the chances of moving *out* of poverty or *increased* the chances of moving *towards* poverty.

### Demographic and asset profile

Over half of the household members were 15 years of age or younger, with a mean household size of 6.7 members, and approximately 50% of households were from rural regions (Table 2). We found no statistically significant differences in household demographics when stratified by poverty trajectory status. Among the 838 households, 21.2% (n = 178) reported having a child with a surgical condition (Table 3). Families with a child with a surgical condition were more likely to have a greater number of family members (p = 0.004), more children (p = 0.003), reside in more urban regions such as Maroodi Jeex (p = 0.047) and to have a monthly household income of less than \$100 (p = 0.075) compared to families of children without surgical conditions.

Table 2. Household demographics, stratified by poverty trajectory status (N = 838).

|                                                | Total<br>(n = 838) | Down<br>(n = 102) | Same<br>(n = 492) | Up<br>(n = 244) | p      |
|------------------------------------------------|--------------------|-------------------|-------------------|-----------------|--------|
| <b>Village Type</b>                            |                    |                   |                   |                 |        |
| Rural                                          | 51.0 (399)         | 64.7 (64)         | 58 (272)          | 27.8 (63)       | 0.2885 |
| Urban                                          | 49.0 (439)         | 35.3 (38)         | 42 (220)          | 72.2 (181)      |        |
| <b>Household size</b>                          | 6.7 (0.2)          | 6.5 (0.3)         | 6.6 (0.2)         | 7 (0.2)         | 0.2971 |
| <b>No. children per household</b>              | 3.4 (0.1)          | 3.4 (0.3)         | 3.5 (0.1)         | 3.4 (0.1)       | 0.649  |
| <b>Household age</b>                           |                    |                   |                   |                 |        |
| < 1 y                                          | 2.4 (146)          | 1.7 (11)          | 2.5 (92)          | 2.7 (43)        | 0.1695 |
| 1–5 y                                          | 18.9 (1090)        | 19.8 (138)        | 19.6 (654)        | 17.2 (296)      |        |
| 6–10 y                                         | 18.2 (1002)        | 17.6 (125)        | 18.9 (593)        | 16.8 (279)      |        |
| 11–15 y                                        | 14.1 (759)         | 14.7 (92)         | 14.1 (441)        | 13.9 (225)      |        |
| > 15 y                                         | 46.3 (2623)        | 46.2 (301)        | 44.9 (1479)       | 49.4 (834)      |        |
| <b>Household income (monthly, all sources)</b> |                    |                   |                   |                 |        |
| \$0 - \$100                                    | 34.5 (271)         | 57.7 (52)         | 37.7 (186)        | 15.9 (33)       | 0.1365 |
| \$100 - \$400                                  | 32.9 (272)         | 20 (25)           | 34 (155)          | 36.5 (92)       |        |
| \$400 or more                                  | 7 (53)             | 5 (4)             | 6.4 (27)          | 9.3 (22)        |        |
| Unknown or missing                             | 25.6 (242)         | 17.3 (21)         | 21.9 (124)        | 38.3 (97)       |        |
| <b>Region</b>                                  |                    |                   |                   |                 |        |
| Awdal                                          | 16.4 (90)          | 14.7 (14)         | 20.9 (66)         | 6.5 (10)        | 0.1288 |
| Maroodi Jeex                                   | 40.7 (488)         | 27.3 (46)         | 32.4 (252)        | 66.9 (190)      |        |
| Sahil                                          | 2.8 (40)           | 1.7 (3)           | 3.1 (27)          | 2.7 (10)        |        |
| Sanaag                                         | 13.1 (60)          | 17.4 (10)         | 13.5 (38)         | 10.1 (12)       |        |
| Sool                                           | 8.7 (39)           | 7.1 (4)           | 11.6 (32)         | 2.5 (3)         |        |
| Togdheer                                       | 18.3 (121)         | 31.7 (25)         | 18.5 (77)         | 11.2 (19)       |        |

<https://doi.org/10.1371/journal.pone.0219974.t002>

### Poverty status and trajectories

Between 2010 and 2017, most homes across Somaliland moved away from poverty as measured by an increased total number of assets (Fig 1). The rate of households reporting owning a refrigerator, washing machine, or car nearly doubled between 2010 and 2017, while the rate of households owning a TV or radio increased by approximately 10%. Currently, approximately one-third of households own farm animals or chickens (34.2%), 31.0% own a TV or radio, 22.0% own a refrigerator, 16.3% own a washing machine, and 11.8% own a car. Three years prior to survey, there were a slightly lower number of assets, with 34.9% of households reporting farm animals or chickens, 25.4% a TV or radio, 18.4% a refrigerator, 13.2% a washing machine, and 10.1% a car. Seven years prior to survey there were lower rates of total owned assets, with 31.2% of households reporting owning chickens and farm animals (31.2%), TV or radio (20.1%), refrigerator (12.0%), washing machine (8.7%), and a car (6.7%)

### The association of poverty trajectories and pediatric surgery

We found that the presence of a surgical condition in a child, *regardless of whether or not surgical care was received*, led to risk of loss of assets or moving towards poverty for families across Somaliland (Fig 2). We found that overall, a greater proportion of households with a child with surgical conditions (CSC) moved down in assets (19.2%) compared with households without a child with surgical conditions (NSC, 10.8%) (p = 0.05). Current asset scores and changes in assets differed for CSC households depending on whether the child received

Table 3. Household demographics, stratified by households with a child with surgical conditions (N = 838).

| Characteristic                                 | TOTAL<br>(n = 838) | NSC<br>(n = 660) | CSC<br>(n = 178) | P     |
|------------------------------------------------|--------------------|------------------|------------------|-------|
| <b>Village Type</b>                            | % (n)              | % (n)            | % (n)            |       |
| Rural                                          | 51.0 (399)         | 53.1 (325)       | 42.6 (74)        | 0.182 |
| Urban                                          | 49.0 (439)         | 46.9 (335)       | 57.4 (104)       |       |
| <b>Household size*</b>                         | 6.7 (0.2)          | 6.5 (0.2)        | 7.4 (0.4)        | 0.004 |
| <b>No. children per household*</b>             | 3.4 (0.1)          | 3.3 (0.1)        | 3.9 (0.1)        | 0.003 |
| <b>Household age</b>                           |                    |                  |                  |       |
| < 1 y                                          | 2.4 (146)          | 2.4 (107)        | 2.7 (39)         | 0.316 |
| 1–5 y                                          | 18.9 (1090)        | 18.8 (842)       | 19.3 (248)       |       |
| 6–10 y                                         | 18.2 (1002)        | 17.8 (751)       | 19.4 (251)       |       |
| 11–15 y                                        | 14.1 (759)         | 14 (579)         | 14.4 (180)       |       |
| > 15 y                                         | 46.3 (2623)        | 46.9 (2026)      | 44.3 (597)       |       |
| <b>Household income (monthly, all sources)</b> |                    |                  |                  |       |
| \$0 - \$100                                    | 46.4 (271)         | 44.0 (205)       | 56.4 (66)        | 0.214 |
| \$100 - \$400                                  | 44.2 (272)         | 46.2 (224)       | 35.7 (48)        |       |
| \$400 or more                                  | 9.4 (53)           | 9.8 (45)         | 7.8 (8)          |       |
| <b>Region</b>                                  |                    |                  |                  |       |
| Awdal                                          | 16.4 (90)          | 17.3 (73)        | 13 (17)          | 0.047 |
| Maroodi Jeex                                   | 40.7 (488)         | 39 (376)         | 47.7 (112)       |       |
| Sahil                                          | 2.8 (40)           | 2.4 (27)         | 4.6 (13)         |       |
| Sanaag                                         | 13.1 (60)          | 14.3 (52)        | 8.5 (8)          |       |
| Sool                                           | 8.7 (39)           | 7.8 (28)         | 12.3 (11)        |       |
| Togdheer                                       | 18.3 (121)         | 19.3 (104)       | 14 (17)          |       |

NSC: Households without children with surgical conditions; CSC: Households with children with surgical conditions.

\*mean (SE)

<https://doi.org/10.1371/journal.pone.0219974.t003>

surgical care (Table 4). Current mean asset scores were higher among NSC homes (1.1) than among CSC homes with children with surgical conditions if they did not receive surgery, regardless if they sought healthcare (1.0) or not (0.8). However, the current mean scores were lower among NCS homes (1.1) than among homes with children with surgical conditions who

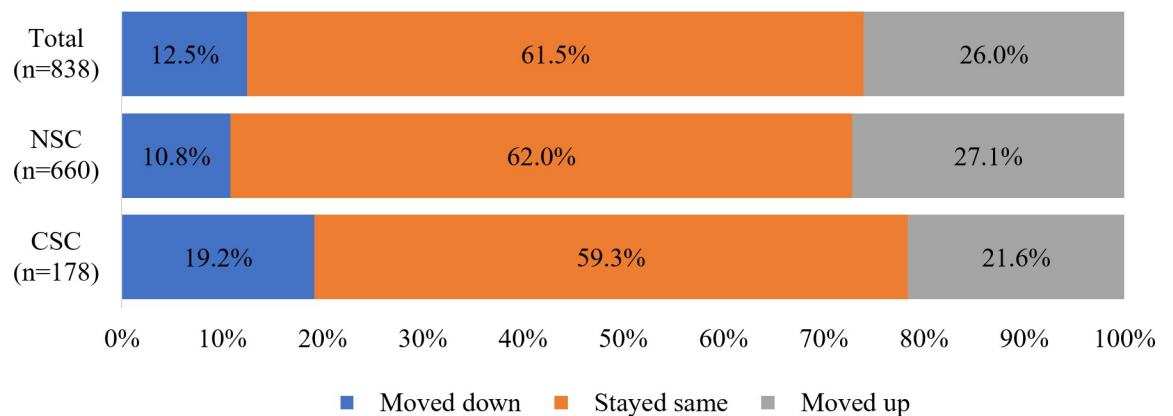

Fig 2. Poverty trajectory of households stratified by presence of child with surgical condition (n = 838).

<https://doi.org/10.1371/journal.pone.0219974.g002>

Table 4. Assets owned and poverty trajectory, stratified by level of healthcare received (n = 1503).

|                     | Household total (n = 838) | No surgical condition (n = 1307) | Surgical conditions (n = 221)      |                                 |                  | p-value all groups* | p-value surgery (y/n)† |
|---------------------|---------------------------|----------------------------------|------------------------------------|---------------------------------|------------------|---------------------|------------------------|
|                     |                           |                                  | No healthcare, no surgery (n = 64) | Healthcare, no surgery (n = 95) | Surgery (n = 53) |                     |                        |
| Current asset score | 1.2 (0.3)                 | 1.1 (0.3)                        | 0.8 (0.2)                          | 1.0 (0.3)                       | 1.8 (0.3)        | 0.021               | 0.037                  |
| Now and 3 years ago | 0.1 (0.1)                 | 0.1 (0.1)                        | 0.2 (0.1)                          | 0.0 (0.1)                       | 0.2 (0.1)        | 0.147               | 0.226                  |
| Now and 7 years ago | 0.3 (0.2)                 | 0.3 (0.2)                        | 0.1 (0.1)                          | 0.2 (0.3)                       | 0.4 (0.3)        | 0.045               | 0.020                  |
| 3 and 7 years ago   | 0.2 (0.1)                 | 0.2 (0.1)                        | -0.1 (0.1)                         | 0.1 (0.2)                       | 0.3 (0.2)        | 0.022               | 0.014                  |

\*All group p-value compares children with no surgical conditions, surgical conditions which did not receive healthcare or surgery, surgical conditions which sought healthcare but did not receive surgery, and surgical conditions which received surgery (n = 1503).

†Surgery p-value compares children with surgical conditions which did not receive surgery and children with surgical conditions which received surgery (n = 221)

<https://doi.org/10.1371/journal.pone.0219974.t004>

received surgery (1.8) (p = 0.037). The same trend is seen when asset scores are compared between 2017 and 2010 (p = 0.045) and between 2014 and 2010 (p = 0.022), but not when compared between 2017 and 2014 (p = 0.0147). Current asset scores and changes in asset scores also differed for CSC homes depending on whether the child received surgery. Homes with children with surgical conditions that received surgery had a higher current asset score than homes whose child did not receive surgery (p = 0.037).

### Predictors of moving towards poverty

Among all households, multivariate analysis confirmed that the presence of a pediatric surgical condition was a significant independent predictor of moving towards poverty (Fig 3, Model 1). The odds of moving towards poverty was 2.8 times higher among CSC homes than among NSC homes (95% CI: 1.5, 5.2; p-value 0.004), adjusting for the other covariates (see full covariate list in Table 5). Other significant predictors included the region where the child resided and household income. The odds of moving toward poverty was 2.9 times higher in Togdheer region than Maroodi Jeex (95% CI: 1.2, 6.8; p-value = 0.018), adjusting for other covariates. The odds of moving towards poverty was 1.9 times higher among homes with low incomes of <\$100 than homes with higher incomes (95% CI: 1.0, 3.7; p-value = 0.063).

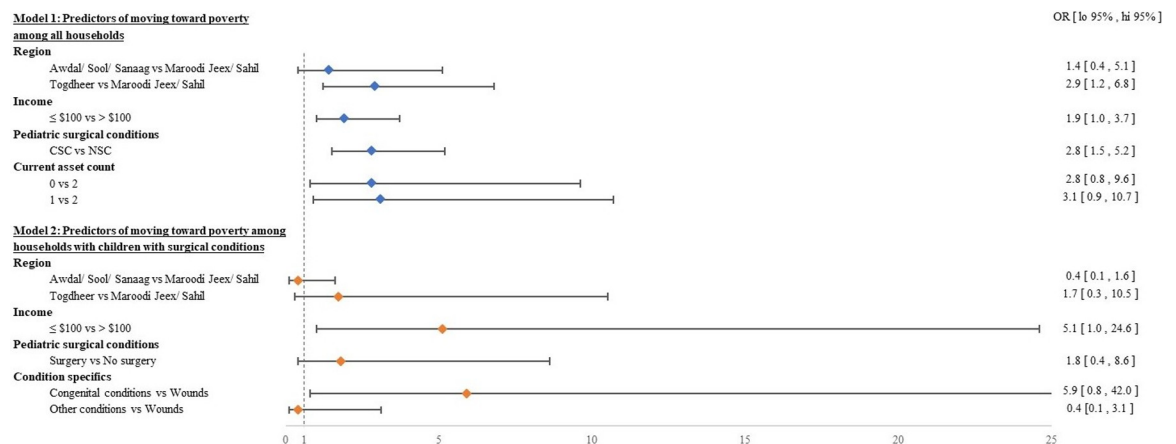

NOTE: Model 1 is adjusted for the following covariates: number of children in household, number of total household size, number of health clinic visits in the past 12 months, hours driving to Hargeisa, number of weeks ill in the past 12 months, village type. Model 2 is adjusted for the following covariates: gender of child in need of surgery, number of children in household, number of total household size, number of health clinic visits in the past 12 months, hours driving to Hargeisa, number of weeks ill in the past 12 months, village type.

Fig 3. Predictors of moving towards poverty.

<https://doi.org/10.1371/journal.pone.0219974.g003>



Table 5. Full list of covariates in multivariate models.

| MODEL 1: PREDICTORS OF MOVING TOWARDS POVERTY AMONG ALL HOUSEHOLDS                                           |     |     |      |         |
|--------------------------------------------------------------------------------------------------------------|-----|-----|------|---------|
|                                                                                                              | OR  | CI  |      | P value |
| <b>Household has a child with a surgical condition (reference NSC)</b>                                       |     |     |      |         |
| CSC                                                                                                          | 2.8 | 1.5 | 5.2  | 0.004   |
| <b>Current asset count (reference 2+)</b>                                                                    |     |     |      |         |
| 0                                                                                                            | 2.8 | 0.8 | 9.6  | 0.103   |
| 1                                                                                                            | 3.1 | 0.9 | 10.7 | 0.079   |
| <b>No. of children (reference 1–3)</b>                                                                       |     |     |      |         |
| 3+                                                                                                           | 0.9 | 0.5 | 1.4  | 0.522   |
| <b>Household size (reference 3–5)</b>                                                                        |     |     |      |         |
| 6–10                                                                                                         | 1.9 | 0.8 | 4.6  | 0.166   |
| 11+                                                                                                          | 0.3 | 0.0 | 1.8  | 0.172   |
| <b>No. of health clinic visits (reference 0)</b>                                                             |     |     |      |         |
| 1–3                                                                                                          | 0.4 | 0.1 | 1.9  | 0.223   |
| 4+                                                                                                           | 0.2 | 0.0 | 1.1  | 0.065   |
| <b>Hours driving to Hargeisa (reference 0–2)</b>                                                             |     |     |      |         |
| 2–6                                                                                                          | 1.1 | 0.5 | 2.4  | 0.786   |
| 6+                                                                                                           | 1.1 | 0.2 | 4.6  | 0.931   |
| <b>No. of weeks ill in past year (reference 0)</b>                                                           |     |     |      |         |
| 1–2 weeks                                                                                                    | 5.5 | 1.7 | 18.1 | 0.008   |
| 2+ weeks                                                                                                     | 3.1 | 0.8 | 12.6 | 0.104   |
| <b>Village type (reference urban)</b>                                                                        |     |     |      |         |
| Rural                                                                                                        | 1.0 | 0.4 | 2.1  | 0.892   |
| <b>Region (reference Maroodi Jeex/Sahil)</b>                                                                 |     |     |      |         |
| Awdal/Sool/Sanaag                                                                                            | 1.4 | 0.4 | 5.1  | 0.597   |
| Togdheer                                                                                                     | 2.9 | 1.2 | 6.8  | 0.018   |
| <b>Income (reference \$100+)</b>                                                                             |     |     |      |         |
| \$0–100                                                                                                      | 1.9 | 1.0 | 3.7  | 0.063   |
| <b>MODEL 2: PREDICTORS OF MOVING TOWARDS POVERTY AMONG HOUSEHOLDS WITH CHILDREN WITH SURGICAL CONDITIONS</b> |     |     |      |         |
| <b>Hours driving to Hargeisa (reference 0–2)</b>                                                             |     |     |      |         |
| 2+                                                                                                           | 5.3 | 1.2 | 22.8 | 0.028   |
| <b>Child gender (reference male)</b>                                                                         |     |     |      |         |
| Female                                                                                                       | 0.6 | 0.2 | 2.4  | 0.496   |
| <b>Condition specifics (reference wounds)</b>                                                                |     |     |      |         |
| Congenital deformities                                                                                       | 5.9 | 0.8 | 42.0 | 0.072   |
| Other conditions                                                                                             | 0.4 | 0.1 | 3.1  | 0.390   |
| <b>Received surgery (reference yes)</b>                                                                      |     |     |      |         |
| No                                                                                                           | 1.8 | 0.6 | 5.4  | 0.279   |
| <b>No. of children (reference 1–3)</b>                                                                       |     |     |      |         |
| 4+                                                                                                           | 1.8 | 0.4 | 6.9  | 0.395   |
| <b>Household size (reference 3–5)</b>                                                                        |     |     |      |         |
| 6+                                                                                                           | 1.8 | 0.4 | 6.9  | 0.395   |
| <b>No. of health clinic visits (reference 0)</b>                                                             |     |     |      |         |
| 1+                                                                                                           | 0.4 | 0.0 | 9.6  | 0.534   |
| <b>No. of weeks ill in past year (reference 0)</b>                                                           |     |     |      |         |
| 1+                                                                                                           | 1.8 | 0.2 | 20.6 | 0.619   |
| <b>Region (reference Maroodi Jeex/Sahil)</b>                                                                 |     |     |      |         |

(Continued)

Table 5. (Continued)

|                                       |     |     |      |       |
|---------------------------------------|-----|-----|------|-------|
| Awdal/Sool/Sanaag                     | 0.4 | 0.1 | 1.6  | 0.188 |
| Togdheer                              | 1.7 | 0.3 | 10.5 | 0.568 |
| <b>Village type (reference urban)</b> |     |     |      |       |
| Rural                                 | 1.1 | 0.4 | 2.6  | 0.859 |
| <b>Income (reference \$100+)</b>      |     |     |      |       |
| \$0–100                               | 5.1 | 1.0 | 24.6 | 0.045 |

CI = Confidence interval; CSC = Household with a child with a surgical need; NSC = Household without a child with a surgical need; OR = Odds ratio

<https://doi.org/10.1371/journal.pone.0219974.t005>

Among households with a child with a surgical condition, the odds of moving towards poverty are even more pronounced among the significant predictors (**Fig 3: Model 2**) than among all households in Model 1. Although not statistically significant, the odds of moving towards poverty among CSC homes who received surgery was 1.8 times higher than among CSC homes who did not receive surgery (95% CI: 0.3, 8.6). The odds of moving towards poverty was 1.7 times higher among persons living in Togdheer (95% CI: 0.3, 10.5; p-value 0.057) than those living in Maroodi Jeex, adjusting for other covariates. The odds of moving towards poverty was 5.1 times higher among homes with low incomes of <\$100 than homes with higher incomes (95% CI: 1.0, 24.6; p-value = 0.045), adjusting for other covariates. Lastly, the odds of moving towards poverty among CSC homes was 5.9 times higher for families with a child with a congenital deformity compared with families with a child with wounds (95% CI: 0.8, 42.0; p-value = 0.072), adjusting for other covariates.

## Discussion

Understanding the association between poverty trajectories and health care in LMICs has tremendous potential for policy development. Since recent civil conflict, most families in Somaliland have had an overall improvement in asset measures and ascent out of poverty. Although these improvements are notable and encouraging for the country, our study shows that economic progress has not been equal among all families. Most notably, the presence of a surgical condition in a child is a strong predictor of poverty descent rather than upward mobility, suggesting that this single stressor can limit the capacity of a family to improve its economic status. The present study supports the original study hypothesis that the presence of a surgical condition in a child, regardless if surgical care was provided, is associated with poverty descent.

Our analysis confirmed previous studies that surgical care can have a devastating economic impact on families in LMICs. Modeling studies from the LCoGS have estimated that up to 33 million individuals face catastrophic health expenditures due to medical costs of surgery, and an additional 48 million facing catastrophic expenditures from non-medical costs of transportation, food, and lodging alone.[1] We have extended these analysis to assessment of the impact of surgical care on family assets, and found that households with a child with a surgical condition were poorer with lower asset scores and were more likely to descend into poverty than homes without a child with a surgical condition.

Interestingly, the financial impact of a surgical condition increased the risk of moving towards poverty regardless whether or not the child received surgical care, although the reasons for these changes are not defined by our analysis. We suspect though for families with limited assets who could not access surgical care for their child, the presence of the condition itself with long-term associated morbidities may have put additional chronic financial strain

on the family, detracting them from the capacity to climb out of poverty. For families with assets to access surgical care, both direct and indirect health care costs may have contributed to their descent towards poverty. These findings highlight the importance of incorporating all families with a child with surgical conditions into future research, regardless of whether the family accessed care. Although not all assets a family could have had were asked about, the assets recorded through the questionnaire according to the Stages of Progress scale have been shown to a reliable and valid indicator and proxy for financial stability and income.[24] Most existing macro- and micro-economic research focus only on direct and indirect costs of care, not accounting for the vast majority of patients with surgical conditions who do not receive care at all. Thus, the global financial impact of surgical conditions is likely grossly underestimated, with substantial implications for policy guidance and future estimates of the impact of surgical conditions on global economies.

Families in our study who received surgical care for their child had significantly higher current asset scores than families without a child with a surgical condition. This suggests that the families receiving health care are among the most affluent in Somaliland, consistent with many other LMICs. Our sampling methodology was proportional to population (i.e., weighted) and randomized. Thus, our finding that the most affluent families received surgeries is not a self-selection problem, due to the randomized sampling strategy, but rather a major finding of the study. A recent World Bank survey in Somaliland found that children born into poorer households were less likely to receive medical care than more affluent households.[41] These findings confirm the value of integrating surgical care as part of universal health coverage (UHC). Reducing the costs of a child's surgical procedure may improve healthcare-seeking behaviors among poor families, thereby potentially improving the family's overall poverty trajectory. By macroeconomic metrics, Somaliland is among with world's poorest countries, with 29% of people in urban areas and 38% of those in rural areas classified as living in poverty,[41] ranking the region as the 4<sup>th</sup> poorest country in terms of GDP per capita. In terms of extreme poverty, the rural/urban disparity is even more pronounced, with 24% of people in rural Somaliland living under extreme poverty, compared to 8% of urban areas.[41] To address risks of poverty descent related to surgical care in Somaliland, implementation of several health financing reforms will likely be required. From a policy standpoint, incorporating systems for the financing of surgical care for children as part of UHC is critical to improve the health care of children. Although such investments can be substantial, as shown in the LCoGS, the required investments to provide basic surgical care are far lower than the estimated financial losses if such reforms are not undertaken.<sup>42</sup>

This study has several limitations. Data was collected through a community-based, household assessment by non-surgeon enumerators. Although the data collectors were medical professionals, they may have not been adequately trained to assess the presence of surgical conditions in the households. Nomadic families and families residing in conflict-prone areas of the upper northeast regions may have been underrepresented. If these families are poorer than the ones in our households, our estimates could be biased towards the null and underestimate the association between poverty, location, and the presence of a pediatric surgical condition. Although nomadic populations were not sought out, these groups in Somaliland often reside in *aqals* in rural villages, contributing to the rural population and these households were included in the sampling strategy. Another limitation was families reported household income in terms of monthly amounts. Data collectors noted that families sometimes had difficulty estimating their monthly income for several reasons: monthly income varied from month to month, agricultural and pastoral workers do not always receive a monthly income and thus the value of their livestock is difficult to estimate, and Somaliland uses both the Somaliland shilling and USD as currency. In addition, we were unable to assess the percent of families

under the poverty line in Somaliland, as income data was collected in a categorical fashion rather than continuously. Lastly, the effects of surgical conditions on a family's assets may be endogenous. However, data regarding assets was collected in a retrospective nature by comparing starting and ending assets throughout a time period, thus greatly lessening the risk of endogeneity.

Our findings further support many existing macroeconomic and microeconomic analyses that surgical care in LMICs offers financial risk protection against impoverishment.[1, 2] Extension of universal health coverage to include support for surgical care may contribute to strengthening other aspects of healthcare.[1, 42, 43] We offer several policy recommendations to minimize the risks of movements towards poverty for families of children with surgical conditions:

- A national health care plan should include strategic support for basic surgical services addressing the health needs of children, as increasing evidence supports investing in surgical services is cost-effective and supports strengthening of the health system[1–3]
- Implementation of a universal health coverage package (UHC) should include care for essential surgical procedures, particularly in rural areas of Somaliland
- Inclusion of the total population in LMICs affected by surgical conditions in future economic analyses to accurately measure the impact of poverty and surgery.

## Acknowledgments

We want to thank the Global Initiative for Children's Surgery (GICS) for its support of this work. GICS ([www.globalchildrensurgery.org](http://www.globalchildrensurgery.org)) is a network of children's surgical and anesthesia providers from low-, middle-, and high-income countries collaborating for the purpose of improving the quality of surgical care for children globally.

Acknowledgments Global Initiative for Children's Surgery Collaborating

Author List: Naomi Wright, Guy Jensen, Etienne St-Louis, David Grabski, Yasmine Yousef, Neema Kaseje, Laura Goodman, Jamie Anderson, Emmanuel Ameh, Tahmina Banu, Stephen Bickler, Marilyn Butler, Michael Cooper, Zipporah Gathuya, Patrick Kamalo, Bertille Ki, Rashmi Kumar, Vrisha Madhuri, Keith Oldham, DorukOzgediz, Dan Poenaru, John Sekabira, Lily Saldaña Gallo, Sabina Siddiqui, Benjamin Yapo, Francis A. Abantanga, Mohamed Abdelmalak, Nurudeen Abdulraheem, Niyi Ade-Ajayi, Edna Adan Ismail, Adesoji Ademuyiwa, Eltayeb Ahmed, Sunday Ajike, Olugbemi Benedict Akintububo, Felix Alakaloko, Brendan Allen, Vanda Amado, Shanthi Anbuselvan, Theophilus Teddy Kojo Anyomih, Leopold Asakpa, Gudeta Assegie, Jason Axt, Ruben Ayala, Frehun Ayele, Harshjeet Singh Bal, Rouma Bankole, Tim Beacon, Zaitun Bokhari, Hiranya Kumar Borah, Eric Borgstein, Nick Boyd, Jason Brill, Britta Budde-Schwartzman, Fred Bulamba, Bruce Bvulani, Sarah Cairo, Juan Francisco Campos Rodezno, Massimo Caputo, Milind Chitnis, Maija Cheung, Bruno Cigliano, Damian Clarke, Tessa Concepcion, Scott Corlew, David Cunningham, Sergio D'Agostino, Shukri Dahir, Bailey Deal, Miliard Derbew, Sushil Dhungel, David Drake, Elizabeth Drum, Basse Edem, Stella Eguma, Olumide Elebute, Beda R. Espineda, Samuel Espinoza, Faye Evans, Omolara Faboya, Jacques Fadhili Bake, Tatiana Fazecas, Mohammad Rafi Fazli, Graham Fieggen, Anthony Figaji, Jean Louis Fils, Tamara Fitzgerald, Randall Flick, Gacelle Fossi, George Galiwango, Mike Ganey, Maryam Ghavami Adel, Vafa Ghorban Sabagh, Sridhar Gibikote, Hetal Gohil, Sarah Greenberg, Russell Gruen, Lars Hagander, Rahimullah Hamid, Erik Hansen, William Harkness, Mauricio Herrera, Intisar Hisham, Andrew Hodges, Sarah

Hodges, Ai Xuan Holterman, Andrew Howard, Romeo Ignacio, Dawn Ireland, Enas Ismail, Rebecca Jacob, Anette Jacobsen, Zahra Jaffry, Deeptiman James, Ebor Jacob James, Adiyasuren Jamiyanjav, Kathy Jenkins, Maria Jimenez, Tarun John K Jacob, Walter Johnson, Anita Joselyn, Nasser Kakembo, Phyllis Kisa, Peter Kim, Krishna Kumar, Charlotte Kvasnovsky, Ananda Lamahe wage, Monica Langer, Christopher Lavy, Taiwo Lawal, Colin Lazarus, Andrew Leather, Chelsea Lee, Basil Leodoro, Allison Linden, Katrine Lofberg, Jonathan Lord, Jerome Loveland, Leecarlo Millano Lumban Gaol, Pavrette Magdala, Luc Kalisya Malemo, Aeesha Malik, John Mathai, Marcia Matias, Bothwell Mbuwayesango, Merrill McHoney, Liz McLeod, Ashish Minocha, Charles Mock, Mubarak Mohamed, Ivan Molina, Ashika Morar, Zahid Mukhtar, Mulewa Mulenga, Bhargava Mullapudi, Jack Mulu, Byambajav Munkhjargal, Arlene Muzira, Mary Nabukenya, Mark Newton, Jessica Ng, Karissa Nguyen, Laurence Isaaya Nta-wunga, Peter M. Nthumba, Alp Numanoglu, Benedict Nwomeh, Kristin Ojomo, Maryrose Osazuwa, Emmanuel Owusu Abem, Shazia Peer, Norgrove Penny, Robin Petroze, Vithya Priya, Ekta Rai, Lola Raji, Vinitha Paul Ravindran, Desigen Reddy, Henry Rice, Yona Ringo, Amezene Robelie, Jose Roberto Baratella, David Rothstein, Coleen Sabatini, Soumitra Saha, Saurabh Saluja, Lubna Samad, Justina Seyi-Olajide, Bello B. Shehu, Ritesh Shrestha, David Sigalet, Martin Situma, Emily Smith, Adrienne Socci, David Spiegel, Peter Ssenyonga, Jacob Stephenson, Erin Stieber, Richard Stewart, Vinayak Shukla, Thomas Sims, Faustin Felicien Mouafo Tambo, Robert Tamburro, Mansi Tara, Ahmad Tariq, Reju Thomas, Leopold Torres Contreras, Stephen Ttendo, Benno Ure, Luca Vricella, Luis Vasquez, Vijayakumar Raju, Jorge Villacis, Gustavo Villanova, Catherine deVries, Amira Waheeb, Saber Waheeb, Albert Wandago, Anne Wesonga, Omolara Williams, Sigal Willner, Nyo Nyo Win, Hussein Wissanji, Paul Mwindekuma Wondoh, Garreth Wood, George Youngson, Denléwendé Sylvain Zabsoure, Luis Enrique Zea Salazar, Adiyasuren Zevee, Bistra Zheleva, Kokila Lakhoo, Diana Farmer.

## Author Contributions

**Conceptualization:** Emily R. Smith, Tessa L. Concepcion, Edna Adan Ismail, Henry E. Rice, Anirudh Krishna.

**Data curation:** Tessa L. Concepcion, Mubarak Mohamed.

**Formal analysis:** Emily R. Smith, Tessa L. Concepcion, Anirudh Krishna.

**Funding acquisition:** Emily R. Smith.

**Investigation:** Tessa L. Concepcion, Mubarak Mohamed, Shugri Dahir, Edna Adan Ismail, Henry E. Rice.

**Methodology:** Emily R. Smith, Tessa L. Concepcion, Edna Adan Ismail, Anirudh Krishna.

**Project administration:** Emily R. Smith, Tessa L. Concepcion, Mubarak Mohamed.

**Supervision:** Emily R. Smith, Tessa L. Concepcion, Shugri Dahir, Edna Adan Ismail.

**Validation:** Emily R. Smith, Tessa L. Concepcion.

**Visualization:** Tessa L. Concepcion.

**Writing – original draft:** Emily R. Smith, Tessa L. Concepcion, Henry E. Rice, Anirudh Krishna.

**Writing – review & editing:** Emily R. Smith, Tessa L. Concepcion, Henry E. Rice, Anirudh Krishna.

## References

1. Meara JG, Leather AJ, Hagander L, Alkire BC, Alonso N, Ameh EA, et al. Global Surgery 2030: evidence and solutions for achieving health, welfare, and economic development. *Lancet* (London, England). 2015; 386(9993):569–624. Epub 2015/05/01. [https://doi.org/10.1016/s0140-6736\(15\)60160-x](https://doi.org/10.1016/s0140-6736(15)60160-x) PMID: 25924834.
2. Saxton AT, Poenaru D, Ozgediz D, Ameh EA, Farmer D, Smith ER, et al. Economic Analysis of Children's Surgical Care in Low- and Middle-Income Countries: A Systematic Review and Analysis. *PloS one*. 2016; 11(10):e0165480. Epub 2016/10/30. <https://doi.org/10.1371/journal.pone.0165480> PMID: 27792792; PubMed Central PMCID: PMC5085034.
3. Chao TE, Sharma K, Mandigo M, Hagander L, Resch SC, Weiser TG, et al. Cost-effectiveness of surgery and its policy implications for global health: a systematic review and analysis. *The Lancet Global health*. 2014; 2(6):e334–45. Epub 2014/08/12. [https://doi.org/10.1016/S2214-109X\(14\)70213-X](https://doi.org/10.1016/S2214-109X(14)70213-X) PMID: 25103302.
4. Smith ER, Concepcion TL, Niemeier KJ, Ademuyiwa AO. Is Global Pediatric Surgery a Good Investment? *World journal of surgery*. 2019; 43(6):1450–5. Epub 2018/12/07. <https://doi.org/10.1007/s00268-018-4867-4> PMID: 30506288.
5. Canfin P, Eide EB, Natalegawa M, Ndiaye M, Nkoana-Mashabane M, Patriota A, et al. Our common vision for the positioning and role of health to advance the UN development agenda beyond 2015. *Lancet* (London, England). 2013; 381(9881):1885–6. Epub 2013/06/04. [https://doi.org/10.1016/s0140-6736\(13\)60952-6](https://doi.org/10.1016/s0140-6736(13)60952-6) PMID: 23726158.
6. Kim JY, Farmer P, Porter ME. Redefining global health-care delivery. *Lancet*. 2013; 382(9897):1060–9. Epub 2013/05/24. [https://doi.org/10.1016/S0140-6736\(13\)61047-8](https://doi.org/10.1016/S0140-6736(13)61047-8) PMID: 23697823.
7. Makasa EM. Letter to global health agency leaders on the importance of surgical indicators. *Lancet*. 2014; 384(9956):1748. Epub 2014/12/03. [https://doi.org/10.1016/S0140-6736\(14\)62012-2](https://doi.org/10.1016/S0140-6736(14)62012-2) PMID: 25455247.
8. Dare AJ, Grimes CE, Gillies R, Greenberg SL, Hagander L, Meara JG, et al. Global surgery: defining an emerging global health field. *Lancet* (London, England). 2014; 384(9961):2245–7. Epub 2014/05/24. [https://doi.org/10.1016/s0140-6736\(14\)60237-3](https://doi.org/10.1016/s0140-6736(14)60237-3) PMID: 24853601.
9. Huber B. Finding surgery's place on the global health agenda. *Lancet*. 2015; 385(9980):1821–2. Epub 2015/05/01. [https://doi.org/10.1016/S0140-6736\(15\)60761-9](https://doi.org/10.1016/S0140-6736(15)60761-9) PMID: 25924836.
10. Butler E, Tran T, Fuller A, Makumbi F, Luboga S, Ssenono V, et al. Quantifying the burden of unmet pediatric surgical needs in Uganda: Results from a nationwide cross-sectional, household survey (in press). *Pediatrics and International Health*. 2016.
11. Butler EK, Tran TM, Fuller AT, Brammell A, Vissoci JR, de Andrade L, et al. Quantifying the pediatric surgical need in Uganda: results of a nationwide cross-sectional, household survey. *Pediatric surgery international*. 2016; 32(11):1075–85. Epub 2016/09/12. <https://doi.org/10.1007/s00383-016-3957-3> PMID: 27614904.
12. Bickler SW, Rode H. Surgical services for children in developing countries. *Bulletin of the World Health Organization*. 2002; 80(10):829–35. Epub 2002/12/10. PMID: 12471405; PubMed Central PMCID: PMC2567648.
13. Smith ER, Vissoci JRN, Rocha TAH, Tran TM, Fuller AT, Butler EK, et al. Geospatial analysis of unmet pediatric surgical need in Uganda. *Journal of pediatric surgery*. 2017. Epub 2017/04/22. <https://doi.org/10.1016/j.jpedsurg.2017.03.045> PMID: 28427854.
14. Zafar SN, Canner JK, Nagarajan N, Kushner AL, Gupta S, Canner JK, et al. Road traffic injuries: Cross-sectional cluster randomized countrywide population data from 4 low-income countries. *International Journal of Surgery*. 2018; 52:237–42. <https://doi.org/10.1016/j.ijso.2018.02.034> PMID: 29471158
15. Appenteng R, Nelp T, Abdelgadir J, Weledji N, Haglund M, Smith E, et al. A systematic review and quality analysis of pediatric traumatic brain injury clinical practice guidelines. *PloS one*. 2018; 13(8): e0201550. Epub 2018/08/03. <https://doi.org/10.1371/journal.pone.0201550> PMID: 30071052; PubMed Central PMCID: PMC6072093.
16. Dave DR, Nagarjan N, Canner JK, Kushner AL, Stewart BT. Rethinking burns for low & middle-income countries: Differing patterns of burn epidemiology, care seeking behavior, and outcomes across four countries. *Burns: journal of the International Society for Burn Injuries*. 2018; 44(5):1228–34. Epub 2018/02/25. <https://doi.org/10.1016/j.burns.2018.01.015> PMID: 29475744.
17. Abdelgadir J, Smith ER, Punchak M, Vissoci JR, Staton C, Muhindo A, et al. Epidemiology and Characteristics of Neurosurgical Conditions at Mbarara Regional Referral Hospital. *World Neurosurgery*. 2017; 102:526–32. <https://doi.org/10.1016/j.wneu.2017.03.019> PMID: 28342925
18. Bearden A, Fuller AT, Butler EK, Tran T, Makumbi F, Luboga S, et al. Rural and urban differences in treatment status among children with surgical conditions in Uganda. *PloS one*. 2018; 13(11):e0205132.

- Epub 2018/11/02. <https://doi.org/10.1371/journal.pone.0205132> PMID: 30383756; PubMed Central PMCID: PMC6211669 alter our adherence to all of PLOS ONE policies on sharing data and materials.
19. Smith ER, van de Water BJ, Martin A, Barton SJ, Seider J, Fitzgibbon C, et al. Availability of post-hospital services supporting community reintegration for children with identified surgical need in Uganda. *BMC health services research*. 2018; 18(1):727. Epub 2018/09/22. <https://doi.org/10.1186/s12913-018-3510-2> PMID: 30236098; PubMed Central PMCID: PMC6149201.
  20. Fuller AT, Haglund MM, Lim S, Mukasa J, Muhumuza M, Kiryabwire J, et al. Pediatric Neurosurgical Outcomes Following a Neurosurgery Health System Intervention at Mulago National Referral Hospital in Uganda. *World Neurosurg*. 2016; 95:309–14. Epub 2016/08/09. <https://doi.org/10.1016/j.wneu.2016.07.090> PMID: 27497624.
  21. Ozgediz D, Poenaru D. The burden of pediatric surgical conditions in low and middle income countries: a call to action. *Journal of pediatric surgery*. 2012; 47(12):2305–11. Epub 2012/12/12. <https://doi.org/10.1016/j.jpedsurg.2012.09.030> PMID: 23217895.
  22. Krishna A. Who Became Poor, Who Escaped Poverty, and Why? Developing and Using a Retrospective Methodology in Five Countries. *Journal of Policy Analysis and Management*. 2010; 29(2):351–72.
  23. Krishna A. Escaping poverty and becoming poor: who gains, who loses, and why? *World development*. 2004; 32(1):121–36.
  24. Carter MR, Barrett CB. The Economics of Poverty Traps and Persistent Poverty: An Asset-Based Approach. *Journal of Development Studies*. 2006; 42(2):178–99.
  25. Krishna A. Stages of Progress: A Community-Based Methodology for Defining and Understanding Poverty. <https://sites.duke.edu/krishna/files/2013/06/SoP.pdf>. 2005.
  26. Boyce R, Rosch R, Finlayson A, Handuleh D, Walhad SA, Whitwell S, et al. Use of a bibliometric literature review to assess medical research capacity in post-conflict and developing countries: Somaliland 1991–2013. *Tropical medicine & international health: TM & IH*. 2015; 20(11):1507–15. Epub 2015/08/22. <https://doi.org/10.1111/tmi.12590> PMID: 26293701.
  27. Concepcion T, Mohamed M, Dahir S, Ismail EA, Poenaru D, Rice HE, et al. Prevalence of Pediatric Surgical Conditions Across Somaliland. 2018:In-Press.
  28. The World Bank. New World Bank GDP and Poverty Estimates for Somaliland. World Bank.
  29. Unicef. Somaliland: Monitoring the situation of children and women | Multiple Indicator Cluster Survey 2011. Hargeisa: Somaliland, Ministry of National Planning and Development, 2014 2014. Report No.
  30. You D, Hug L, Ejdemyr S, Idele P, Hogan D, Mathers C, et al. Global, regional, and national levels and trends in under-5 mortality between 1990 and 2015, with scenario-based projections to 2030: a systematic analysis by the UN Inter-agency Group for Child Mortality Estimation. *The Lancet*; London. 2015; 386(10010):2275–86. [https://doi.org.proxy.lib.duke.edu/10.1016/S0140-6736\(15\)00120-8](https://doi.org.proxy.lib.duke.edu/10.1016/S0140-6736(15)00120-8).
  31. World Health Organization. WHO | Infant mortality. WHO.
  32. Butler EK, Tran TM, Nagarajan N, Canner J, Fuller AT, Kushner A, et al. Epidemiology of pediatric surgical needs in low-income countries. *PloS one*. 2017; 12(3):e0170968. Epub 2017/03/04. <https://doi.org/10.1371/journal.pone.0170968> PMID: 28257418; PubMed Central PMCID: PMC5336197.
  33. Gupta S, Shrestha S, Ranjit A, Nagarajan N, Groen RS, Kushner AL, et al. Conditions, preventable deaths, procedures and validation of a countrywide survey of surgical care in Nepal. *British Journal of Surgery*. 2015; 102(6):700–7. <https://doi.org/10.1002/bjs.9807> PMID: 25809125
  34. Petroze RT, Groen RS, Niyonkuru F, Mallory M, Ntaganda E, Joharifard S, et al. Estimating operative disease prevalence in a low-income country: results of a nationwide population survey in Rwanda. *Surgery*. 2013; 153(4):457–64. <https://doi.org/10.1016/j.surg.2012.10.001> PMID: 23253378
  35. Groen RS, Samai M, Stewart K-A, Cassidy LD, Kamara TB, Yambasu SE, et al. Untreated surgical conditions in Sierra Leone: a cluster randomised, cross-sectional, countrywide survey. *Lancet (London, England)*. 2012; 380(9847):1082–7. [https://doi.org/10.1016/S0140-6736\(12\)61081-2](https://doi.org/10.1016/S0140-6736(12)61081-2)
  36. Tran TM, Fuller AT, Butler EK, Makumbi F, Luboga S, Muhumuza C, et al. Burden of Surgical Conditions in Uganda: A Cross-sectional Nationwide Household Survey. *Annals of Surgery*. 2016. <https://doi.org/10.1097/SLA.0000000000001970> PMID: 27611619
  37. Butler EK, Tran TM, Fuller AT, Brammell A, Vissoci JR, de Andrade L, et al. Quantifying the pediatric surgical need in Uganda: results of a nationwide cross-sectional, household survey. *Pediatric Surgery International*. 2016; 32(11):1075–85. <https://doi.org/10.1007/s00383-016-3957-3> PMID: 27614904
  38. Krishna A. *The Broken Ladder: The Paradox and Potential of India's One-Billion*. Cambridge2017 2017.
  39. Krishna A, Shrader E, editors. *Social capital assessment tool*. Conference on social capital and poverty reduction; 1999.
  40. Office for the Coordination of Humanitarian Affairs. *Regions, districts, and their populations: Somalia 2005 (Draft)*. 2005 2005. Report No.

41. The World Bank. SOMALILAND: Poverty Profile and Overview of Living Conditions. Poverty Global Practice: Africa Region, 2015 January 2015. Report No.
42. Jamison DT, Summers LH, Alleyne G, Arrow KJ, Berkley S, Binagwaho A, et al. Global health 2035: a world converging within a generation. *Lancet* (London, England). 2013; 382(9908):1898–955. Epub 2013/12/07. [https://doi.org/10.1016/s0140-6736\(13\)62105-4](https://doi.org/10.1016/s0140-6736(13)62105-4) PMID: 24309475.
43. Mock C, Cherian M, Juillard C, Donkor P, Bickler S, Jamison D, et al. Developing priorities for addressing surgical conditions globally: furthering the link between surgery and public health policy. *World J Surg*. 2010; 34(3):381–5. Epub 2009/10/31. <https://doi.org/10.1007/s00268-009-0263-4> PMID: 19876689.
